# Supplementary material for: Adenylyl Cyclase and Protein Kinase A Play Redundant and Distinct Roles in Growth, Differentiation, Antifungal Drug Resistance, and Pathogenicity of Candida auris
Source: PubMed Central journal article supplement (PMC8524339; doi:10.1128/mbio.02729-21), 2021-10-19

Figure S3 (Kim et al.)

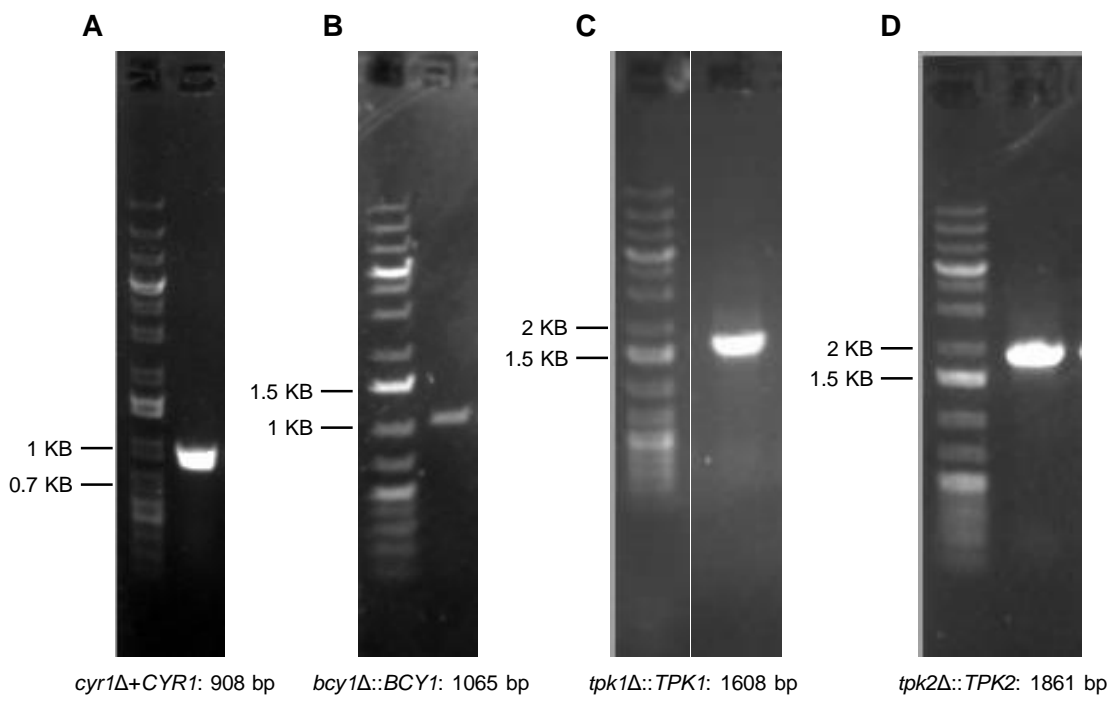

Supplement: mbio.02729-21-sf003.pdf [file mbio.02729-21-sf003.pdf]
